# Supplementary material for: Hybrids of manganese oxide and lipid liquid crystalline nanoparticles (LLCNPs@MnO) as potential magnetic resonance imaging (MRI) contrast agents
Source: Royal Society of Chemistry journal article supplement (doi:10.1039/d3tb01110k), 2023-01-01
Supplement: d3tb01110k1.pdf [file d3tb01110k1.pdf]

## Supplementary Materials

### **Hybrids of manganese oxide and lipid liquid crystalline nanoparticles (LLCNPs@MnO) as potential Magnetic Resonance Imaging (MRI) contrast agents**

Dorota K. Flak<sup>a</sup>, Tomasz Zalewski<sup>a</sup>, Katarzyna Fiedorowicz<sup>a</sup>, Łucja Przysiecka<sup>a</sup>, Marcin Jarek<sup>a</sup>, Adam Klimaszyk<sup>a</sup>, Marek Kempka<sup>a,b</sup>, Agnieszka Zimna<sup>c</sup>, Natalia Rozwadowska<sup>c</sup>, Jonathan Avaro<sup>d</sup>, Marianne Liebi<sup>d</sup>, Grzegorz Nowaczyk<sup>a\*</sup>

*<sup>a</sup>NanoBioMedical Centre, Adam Mickiewicz University Poznań, Wszechnicy Piastowskiej 3, 61-614 Poznań, Poland*

*<sup>b</sup>Department of Biomedical Physics, Faculty of Physics, Adam Mickiewicz University Poznań, Uniwersytetu Poznańskiego 2, 61-614 Poznań, Poland*

*<sup>c</sup>Institute of Human Genetics Polish Academy of Sciences, Strzeszyńska 32, 60-479 Poznań, Poland*

*<sup>d</sup>Empa - Swiss Federal Laboratories for Materials Science and Technology, Lerchenfeldstrasse 5, 9014 St. Gallen, Switzerland*

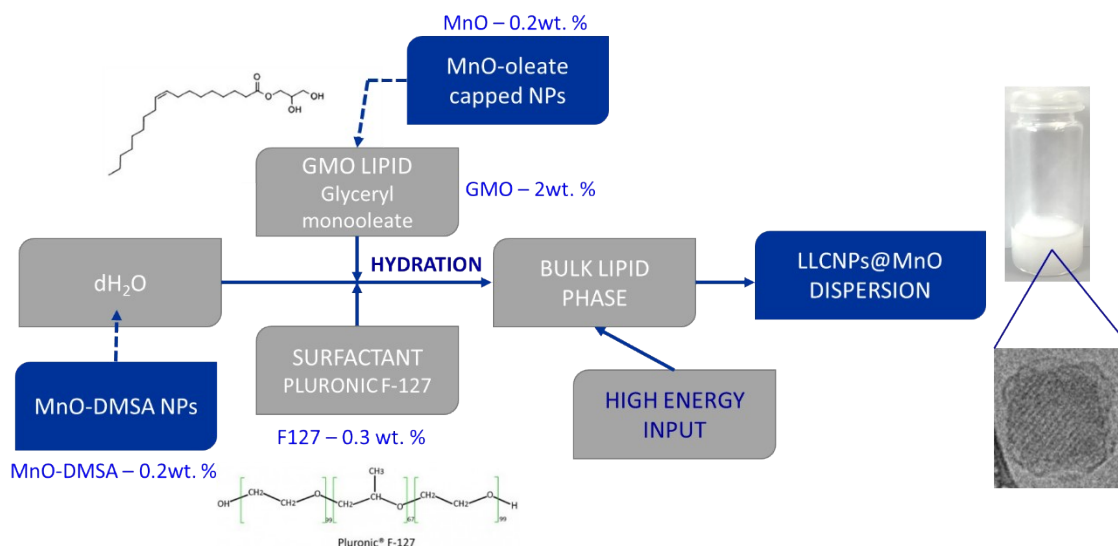

**Figure S1** Schematic representation of the preparation of unloaded and MnO-loaded LLCNPs (with MnO-oleate capped and MnO-DMSA) using the top-down approach.

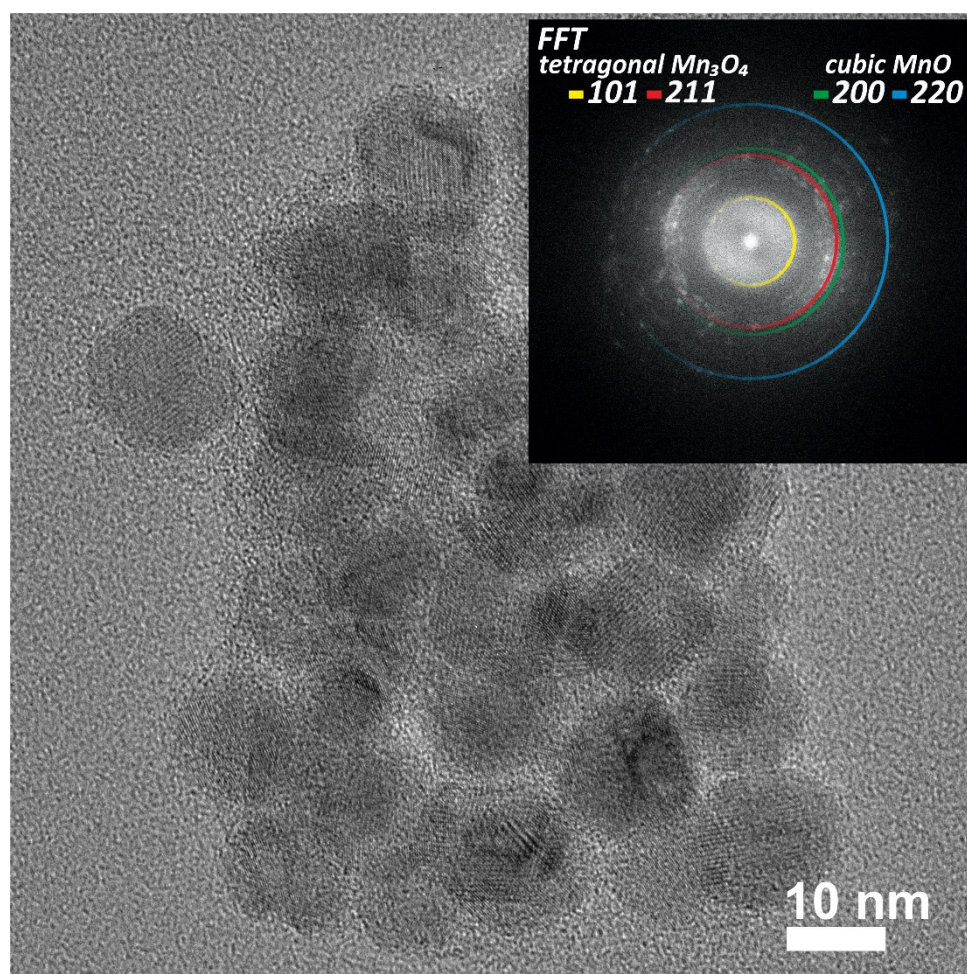

**Figure S2** High resolution transmission electron microscopy (HRTEM) image of aggregated MnO-DMSA NPs. In the inset FFT diffractogram from the image, including all particles, is presented. The rings – yellow, red, green and blue denote diffraction rings characteristic for 101, 211 of Mn<sub>3</sub>O<sub>4</sub> tetragonal structure and 200, 220 of MnO cubic phase, respectively.

**Table S1** Summary of full DLS results of prepared nanoparticle size ( $Z$ -ave – cumulant mean,  $d_{\text{Intensity}}$  - intensity distribution,  $d_{\text{Number}}$  – number distribution, PDI – polydispersity index) and zeta potential

| Sample                | Z-ave / nm | SD    | $d_{\text{Intensity}}$ / nm | SD     | $d_{\text{Number}}$ / nm | SD    | PDI   | SD    | Zeta /mV | SD    |
|-----------------------|------------|-------|-----------------------------|--------|--------------------------|-------|-------|-------|----------|-------|
| MnO- oleate-capped#   | 74.6       | 0.30  | 83.6                        | 1.10   | 15.9                     | 3.00  | 0.308 | 0.035 | -31.1    | 14.20 |
| MnO-DMSA              | 182.9      | 2.35  | 209.8                       | 10.80  | 120.4                    | 18.15 | 0.148 | 0.010 | -14.2    | 0.51  |
| MnO-DMSA_1m           | 185.0      | 17.59 | 239.7                       | 15.42  | 132.6                    | 16.03 | 0.255 | 0.076 | -11.2    | 0.93  |
| MnO-DMSA_HSA          | 12.1       | 1.75  | 4.6 (53.4)*                 | 0.13   | 3.6                      | 0.16  | 0.553 | 0.006 | -3.6     | 0.17  |
|                       |            |       | 313.0 (38.3)*               | 106.40 |                          |       |       |       |          |       |
| LLCNPs                | 148.2      | 2.07  | 175.9                       | 9.94   | 82.9                     | 13.10 | 0.172 | 0.016 | -19.8    | 0.60  |
| LLCNPs_1m             | 160.2      | 0.60  | 193.8                       | 7.80   | 64.6                     | 38.00 | 0.162 | 0.032 | -17.8    | 0.56  |
| LLCNPs_HSA            | 8.6        | 0.20  | 4.6 (62.9)*                 | 0.10   | 3.4                      | 0.10  | 0.440 | 0.009 | -1.6     | 0.86  |
|                       |            |       | 234.5 (35.9)*               | 11.75  |                          |       |       |       |          |       |
| LLCNPs_NR             | 144.3      | 0.61  | 178.5                       | 3.43   | 77.89                    | 5.20  | 0.195 | 0.007 | -20.9    | 1.04  |
| LLCNPs@MnO-oleate     | 220.6      | 1.63  | 246.0                       | 6.33   | 167.8                    | 6.63  | 0.138 | 0.023 | -20.2    | 1.21  |
| LLCNPs@MnO-oleate_1m  | 410.1      | 12.38 | 500.3                       | 27.69  | 242.4                    | 6.65  | 0.297 | 0.032 | -28.5    | 0.61  |
| LLCNPs@MnO-oleate_HSA | 13.0       | 0.30  | 447.5 (51.9)*               | 47.10  | 3.5                      | 0.09  | 0.656 | 0.012 | -0.8     | 0.02  |
|                       |            |       | 4.5 (48.1)*                 | 0.05   |                          |       |       |       |          |       |
| LLCNPs@MnO-DMSA_NR    | 137.4      | 0.76  | 162.4                       | 6.50   | 68.10                    | 23.21 | 0.158 | 0.001 | -18.0    | 0.86  |
| LLCNPs@MnO-DMSA       | 144.4      | 1.98  | 170.6                       | 5.75   | 78.1                     | 12.63 | 0.162 | 0.014 | -16.2    | 1.17  |
| LLCNPs@MnO-DMSA_1m    | 182.6      | 3.60  | 202.7                       | 4.90   | 143.1                    | 3.30  | 0.102 | 0.012 | -21.2    | 2.08  |
| LLCNPs@MnO-DMSA_HSA   | 9.5        | 0.10  | 4.6 (59.5)*                 | 0.06   | 3.4                      | 0.01  | 0.484 | 0.006 | -3.0     | 0.85  |
|                       |            |       | 240.2 (36.7)*               | 7.44   |                          |       |       |       |          |       |
| LLCNPs@MnO-DMSA_NR    | 143.4      | 0.78  | 166.0                       | 5.58   | 88.66                    | 5.93  | 0.158 | 0.012 | -17.6    | 1.30  |
| HSA                   | 10.7       | 0.10  | 4.8 (51.9)*                 | 0.04   | 3.5                      | 0.10  | 0.501 | 0.004 | -9.0     | 0.52  |
|                       |            |       | 88.3 (46.7)*                | 1.76   |                          |       |       |       |          |       |

including standard deviation (SD, n=3).

\*bimodal PSD, values in brackets are the area under PSD peaks; #measurements in hexane

**Table S2** Summary of DLS results of nanoparticle size (*Z*-ave - cumulant mean,  $d_{Intensity}$  - intensity distribution,  $d_{Number}$  - number distribution, PDI - polydispersity index) and zeta potential including standard deviation (SD) for samples previously incubated in cell culture DMEM medium (Dulbecco's

| Sample                     | <i>Z</i> -ave / nm | SD    | $d_{Intensity}$ / nm | SD    | $d_{Number}$ / nm | SD     | PDI   | SD    | Zeta / mV | SD   |
|----------------------------|--------------------|-------|----------------------|-------|-------------------|--------|-------|-------|-----------|------|
| MnO-DMSA                   | 166.8              | 2.56  | 186.0                | 8.39  | 107.7             | 9.33   | 0.179 | 0.020 | -16.2     | 0.86 |
| MnO-DMSA_DMEM_24h          | 500.8              | 18.60 | 588.5                | 8.65  | 372.1             | 166.90 | 0.269 | 0.026 | -19.4     | 0.50 |
| LLCNPs                     | 161.9              | 4.26  | 181.8                | 2.82  | 57.3              | 20.05  | 0.252 | 0.015 | -22.9     | 0.87 |
| LLCNPs_DMEM_24h            | 152.5              | 1.32  | 195.5                | 5.58  | 40.9              | 18.36  | 0.343 | 0.010 | -17.2     | 0.49 |
| LLCNPs@MnO-oleate          | 282.4              | 1.83  | 332.1                | 19.70 | 212.8             | 5.03   | 0.188 | 0.007 | -18.5     | 0.57 |
| LLCNPs@MnO-oleate_DMEM_24h | 219.6              | 5.22  | 311.1                | 12.52 | 81.73             | 75.29  | 0.275 | 0.008 | -33.5     | 1.57 |
| LLCNPs@MnO-DMSA            | 142.8              | 2.28  | 166.6                | 4.75  | 90.7              | 2.51   | 0.135 | 0.008 | -18.2     | 0.40 |
| LLCNPs@MnO-DMSA_DMEM_24h   | 137.0              | 2.05  | 169.3                | 0.51  | 47.5              | 26.42  | 0.182 | 0.004 | -18.6     | 1.15 |

modified Eagle's medium) for 24 h. For measurements new sample batches were used.

**Table S3** The list of primers used in the gene expression studies.

| Gene   | Primer Forward              | Primer Reverse               | Amplicon size |
|--------|-----------------------------|------------------------------|---------------|
| GAPDH  | 5'-AAGGTCGGAGTCAACGGATTT-3' | 5'-ACCAGAGTTAAAAGCAGCCCTG-3' | 66bp          |
| ACTB   | 5'-GCTCTTTTCCAGCCTTCCTT-3'  | 5'-CATACAGGTCTTTGCGGATGT-3'  | 106bp         |
| ACTG1  | 5'-CCGAGCCGTGTTTCCTTCC-3'   | 5'-GCCATGCTCAATGGGGTACT-3'   | 142bp         |
| PFN1   | 5'-GGGTGGAACGCCTACATCG-3'   | 5'-CCATTCACGTAAAACTTGACCG-3' | 182bp         |
| LMNA   | 5'-AATGATCGCTTGGCGGTCTAC-3' | 5'-CACCTCTTCAGACTCGGTGAT-3'  | 93bp          |
| LMNB2  | 5'-GTCCTGGATGAGACGGCTC-3'   | 5'-GCGCTCTTGTTGACCTCGT-3'    | 89bp          |
| TUBA4a | 5'-TGAGATCCGAAATGGCCATA-3'  | 5'-TAGTGACCACGGGCATAGTTG-3'  | 96bp          |

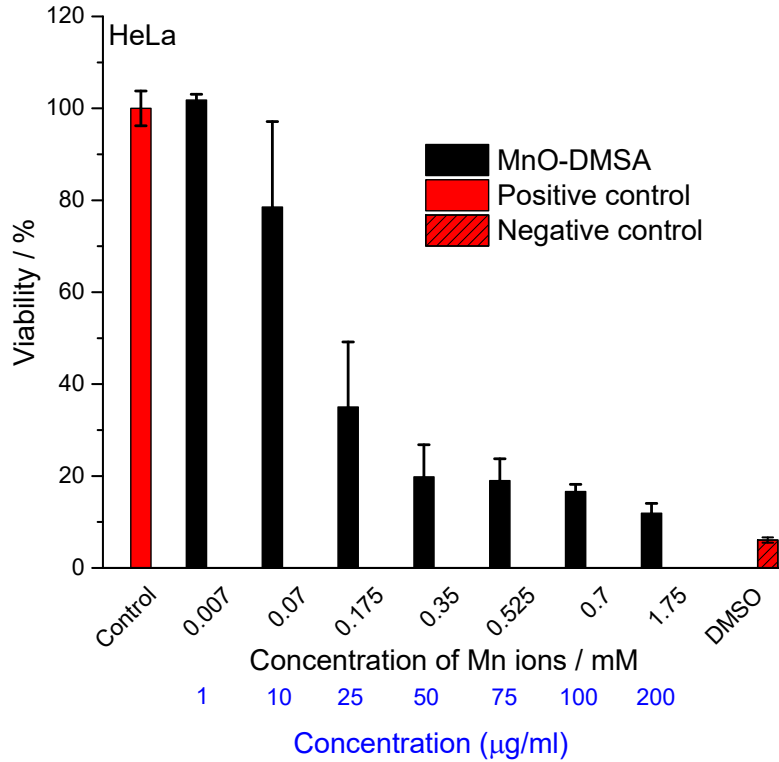

**Figure S3** Viability studies in HeLa cells monolayers showing cytotoxic efficacy of MnO-DMSA in comparison to positive (DMSO) and negative control (non-treated cells), as a function of NPs ( $\mu\text{g/ml}$ ) and Mn ions concentration (in mM). The n-fold viability was measured by WST-1 assay ( $n=3$ ). Based on these preliminary results the “safe” Mn ions concentration range, which was further applied in relaxivity was falling within the range 0.01 – 0.1 mM for MnO-loaded LLCNP.

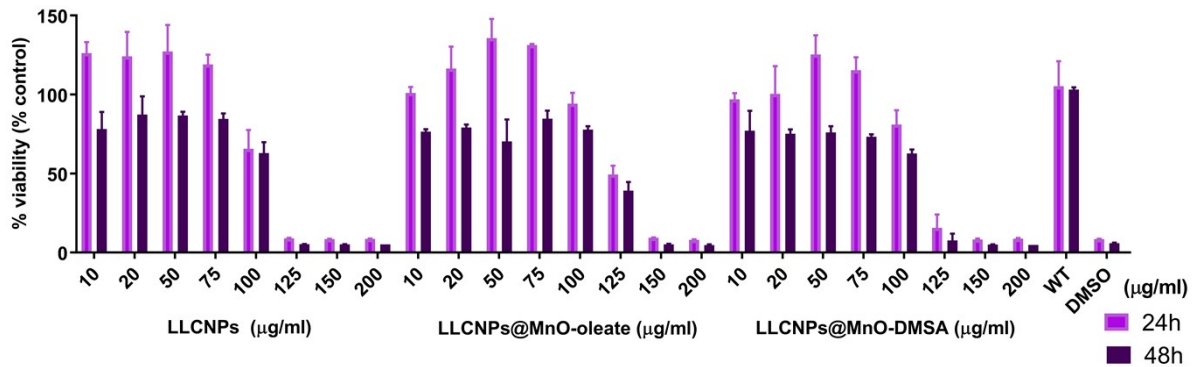

**Figure S4** Viability of normal human fibroblast (MSU1.1 cells) after 24 h and 48 h of incubation with different concentrations (10, 20, 50, 75, 100, 125, 150, 200  $\mu\text{g/mL}$ ) of prepared LLCNPs, LLCNPs@MnO-oleate and LLCNPs@MnO-DMSA, investigated with WST-1 assay. Control is cells non-treated, and DMSO is cells treated with 50% v/v DMSO. Data are given as mean  $\pm$  SD for three replicates.

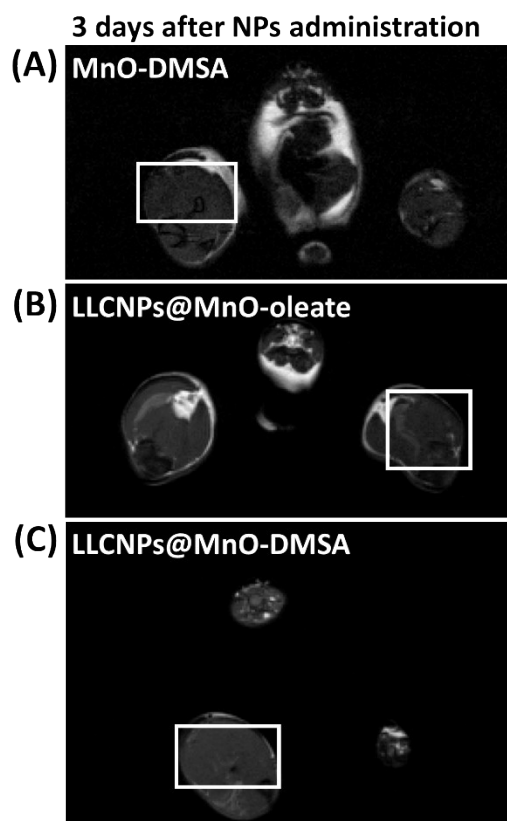

**Figure S5** *In vivo* T<sub>1</sub>-weighted MR images recorded 3 days after administration of: **(A)** MnO-DMSA, **(B)** LLCNPs@MnO-oleate, **(C)** LLCNPs@MnO-DMSA. The images were collected with a 9.4 T horizontal MRI scanner, at 37°C. Marked with a white squares are regions of hind limbs with 3 days earlier administered NPs as contrast agent – no contrast enhancement is observed.
